# Supplementary material for: A Machine Learning Approach to Identify Predictors of Potentially Inappropriate Non-Steroidal Anti-Inflammatory Drugs (NSAIDs) Use in Older Adults with Osteoarthritis
Source: PubMed Central journal article supplement (PMC7794853; doi:10.3390/ijerph18010155), 2020-12-28
Supplement: ijerph-18-00155-s001.pdf [file ijerph-18-00155-s001.pdf]

**Table S1.** ICD-10 Diagnosis codes for gastrointestinal and cardiovascular risk factors.

| <b>Disease or Condition</b>                | <b>ICD-10 codes</b>                                                                                                                                                 |
|--------------------------------------------|---------------------------------------------------------------------------------------------------------------------------------------------------------------------|
| Complicated peptic ulcer disease[25,56]    | K25.0-K25.6, K26.1-K26.2, K26.4-K26.6, K27.1-27.2, K27.4-K27.6, K28.1-28.2, K28.4-K28.6, K29.01, K29.21, K29.41, K29.51, K29.61, K29.71, K29.81, K29.91, K92.0-92.2 |
| Uncomplicated peptic ulcer disease [25,56] | K25.3, K25.7, K25.9, K26.3, K26.7, K26.9, K27.3, K27.7, K27.9, K28.3, K28.7, K28.9, Z87.11                                                                          |
| Dyspepsia [57]                             | K30                                                                                                                                                                 |
| Gastroesophageal reflux disorder [57]      | K21.0, K21.9                                                                                                                                                        |
| Angina [58]                                | I20.0, I20.1, I20.8, I20.9                                                                                                                                          |
| Stroke [59]                                | I60.x, I61.x, I63.x, I64.x, H34.1, G45.x                                                                                                                            |
| Myocardial infarction [57]                 | I21.09, I21.11, I21.19, I21.3, I21.4, I21.9, I21.A9, I25.2                                                                                                          |
| Congestive heart failure [60]              | I50.xx                                                                                                                                                              |
